# Supplementary material for: Perfluorooctanoic acid serum concentrations and half-lives in a community exposed to contaminated drinking water in New York State
Source: Springer Nature journal article supplement (doi:10.1038/s41370-025-00769-z), 2025-04-17
Supplement: MOESM1 [file 41370_2025_769_MOESM1_ESM.pdf]

Supplement Table 1: List of sites identified in peer-reviewed publications and government agency reports with known PFAS contamination and community biomonitoring<sup>a</sup>

|                                                                      | Primary contaminant | Approximate date contamination discovered |
|----------------------------------------------------------------------|---------------------|-------------------------------------------|
| Manufacturing                                                        |                     |                                           |
| C-8 Health Project, Mid-Ohio River Valley, Ohio & West Virginia (33) | PFOA                | 1984-2004                                 |
| Washington County, Minnesota (34)                                    | PFOS                | 2004                                      |
| Paulsboro, New Jersey (35)                                           | PFNA                | 2009                                      |
| Hoosick Falls and Town of Hoosick, New York (36)                     | PFOA                | 2014-2015                                 |
| Petersburgh, New York (37)                                           | PFOA                | 2016                                      |
| Bennington & North Bennington, Vermont <sup>b</sup> (38)             | PFOA                | 2016                                      |
| Belmont/Rockford & Parchment/Cooper, Michigan <sup>b</sup> (39)      | PFOS                | 2017-2018                                 |
|                                                                      |                     |                                           |
| Fire-fighting foam                                                   |                     |                                           |
| Warminster & Horsham Townships, Pennsylvania (40)                    | PFOS                | 2013                                      |
| Ronneby, Sweden (32)                                                 | PFOS                | 2013                                      |
| El Paso County, Colorado (41)                                        | PFHxS               | 2013-2016                                 |
| Pease Air Force Base, New Hampshire (42)                             | PFOS                | May 2014                                  |
| Gustavus, Alaska (43)                                                | PFHxS               | 2018                                      |
| Newburgh, New York <sup>b</sup> (44)                                 | PFOS                | 2016                                      |
|                                                                      |                     |                                           |
| Wastewater sludge                                                    |                     |                                           |
| Decatur, Alabama (45)                                                | PFOS                | 2007                                      |
| Arnsberg, Germany (46)                                               | PFOA                | 2013                                      |
|                                                                      |                     |                                           |

Notes:

<sup>a</sup>This list is likely not exhaustive; it includes sites identified in PubMed searches through 2023 using the terms biomonitoring, PFAS, PFOS, and PFOA.

<sup>b</sup>Government agency report. Government agency reports are not easily identified; the list here includes those known to the authors.

Supplement Table 2: Published community studies with PFOA half-life estimates: sample characteristics, methods and half-life estimates

| Authors                           | Community & sample characteristics                                                                   | End of exposure versus baseline                                                                    | Repeat blood collection timing                                     | PFOA mean at baseline (ppb)                   | PFOA 1/2-life mean (95%CI) years                  | Adjustment:                                                                                                                                                                          |
|-----------------------------------|------------------------------------------------------------------------------------------------------|----------------------------------------------------------------------------------------------------|--------------------------------------------------------------------|-----------------------------------------------|---------------------------------------------------|--------------------------------------------------------------------------------------------------------------------------------------------------------------------------------------|
| Bartell et al. (ref 25)           | C-8: 75% Lubeck, 25% Little Hocking<br>N = 172; Ages 18-89+<br>Baseline: June 2007                   | Lubeck: just after baseline; Little Hocking: 5 months after baseline                               | 6 samples through August 2008, 1 year after baseline               | 180                                           | 2.3 (2.1-2.4) years                               | Timing of water filtration, water district, public, bottled water, sex, age, local and homegrown produce, public water at work                                                       |
| Li, Mucs et al. Appendix (ref 47) | C-8: Belpre, Tupper's Plain, Lubeck<br>N = 437<br>Age 20-60<br>Baseline: 2005-2006                   | Exposures end after baseline:<br>Belpre: Mar 2006<br>Tupper's Plain: May 2006<br>Lubeck: June 2007 | 2-3 samples, at 4.4 and 4.8 years after baseline, through Oct 2010 | 49.1                                          | 2.72 (2.52-2.90) years                            | Age, gender, BMI; date exposure ended applied to baseline blood sample, unless blood sample came after. time between water filtration start date and last blood sample was 3.9 years |
| Li, Fletcher et al. (ref 32)      | Ronneby<br>N = 106<br>Age 4 – 83<br>Baseline: June 2014                                              | 6 months before baseline                                                                           | 7 samples over 2 years, through Sept 2016                          | 21.2                                          | 2.7 (2.5-2.9) years                               | Age, gender, BMI                                                                                                                                                                     |
| Li, Andersson (ref 26)            | Ronneby;<br>N = 114<br>Age: 4 - 84<br>Baseline: June 2014                                            | 6 months before baseline                                                                           | Up to 10 additional samples over 4 years through May 2018          | 16                                            | 2.47 (2.27-2.70) years*<br>2.99 (2.79-3.21) years | Age, gender, BMI, background exposure*, time between exposure ending and blood sample collection                                                                                     |
| Brede et al. (ref 49)             | Arnsberg<br>N = 65; 20 children 5-6;<br>22 mothers 25-47;<br>23 men 30-69<br>Baseline: Sept-Oct 2006 | July 2006; 2 months before baseline                                                                | 2 years after 1 <sup>st</sup> sample, Oct-Nov, 2008                | Children: 22.4<br>Females 25.1<br>Males: 32.8 | 3.26 years (GM)                                   | (Unadjusted half-life); breakthrough creates some ongoing exposure                                                                                                                   |
| Worley et al. (ref 45)            | Decatur<br>N=45<br>Baseline 2010<br>12 years+<br>Mean age: 56.6                                      | Exposure ongoing<br>May have been declining before 2010                                            | 2 <sup>nd</sup> samples 6 years after baseline, in 2016            | 16.3                                          | 3.9 years                                         | Continuing PFOA intake; volume of distribution.                                                                                                                                      |
| Batzella et al. (ref 48)          | Veneto<br>N=5,769<br>Baseline 2017<br>Age 14-52<br>Median age 28                                     | Aug 2013, about 4 years before baseline                                                            | 2 <sup>nd</sup> samples about 4 years after baseline, 2020-22      | 49                                            | 2.36 (2.33-2.40) years                            | Age, sex, BMI, smoking, alcohol, eGFR, education; (background PFOA level subtracted)                                                                                                 |

Supplement Table 3: Summary statistics for PFOA Concentrations in Hoosick and Petersburg Area Public and Private Water Prior to GAC Treatment

[illegible]

Supplement Table 4. Baseline serum PFOA concentrations for Hoosick and Petersburg area participants by water source (samples collected Feb -Nov 2016), and NHANES general population concentrations (2015-2016)

|                        | Hoosick Falls |                   |      |       | Petersburgh |                   |      |              | Other |                   |      |      | NHANES |      |      |
|------------------------|---------------|-------------------|------|-------|-------------|-------------------|------|--------------|-------|-------------------|------|------|--------|------|------|
|                        | N             | GM (95% CI)       | P50  | P95   | N           | GM (95% CI)       | P50  | P95          | N     | GM (95% CI)       | P50  | P95  | GM     | P50  | P95  |
| All participants       | 1573          | 42.1 (39.9, 44.4) | 47.0 | 195.0 | 51          | 9.57 (7.33, 12.5) | 11.3 | <sup>a</sup> | 1618  | 7.16 (6.72, 7.64) | 6.58 | 75.0 | 1.56   | 1.57 | 4.17 |
| Adults over 20         | 1210          | 48.1 (45.2, 51.2) | 57.9 | 211.0 | 46          | 10.3 (7.70, 13.6) | 12.7 | <sup>a</sup> | 1365  | 7.30 (6.79, 7.85) | 6.61 | 79.2 | 1.60   | 1.67 | 4.27 |
| Participants by gender |               |                   |      |       |             |                   |      |              |       |                   |      |      |        |      |      |
| Males                  | 699           | 44.5 (41.1, 8.2)  | 50.5 | 205.0 | 25          | 13.2 (9.28, 18.8) | 14.9 | <sup>a</sup> | 738   | 8.14 (7.39, 8.96) | 7.51 | 86.7 | 1.80   | 1.87 | 4.07 |
| Females                | 874           | 40.3 (37.5, 43.3) | 44.8 | 188.0 | 26          | 7.02 (4.80, 10.3) | 8.48 | <sup>a</sup> | 880   | 6.44 (5.90, 7.01) | 5.77 | 59.1 | 1.36   | 1.37 | 4.17 |

<sup>a</sup>95th percentiles are not provided due to small numbers, to protect confidential participant results.

Sources: NYSDOH Biomonitoring program; NHANES<sup>56</sup>

Supplement Table 5. Comparison of Village of Hoosick Falls study participant demographics and overall Village demographics (2010 U.S. Census)

|                     | Study Participants | Village of Hoosick Falls |
|---------------------|--------------------|--------------------------|
| Number of Residents | 1,573              | 3,501                    |
| By gender           |                    |                          |
| Males               | 44%                | 47%                      |
| Females             | 56%                | 53%                      |
| By age              |                    |                          |
| Less than 3 years   | 2%                 | 4%                       |
| 3-5 years           | 3%                 | 3%                       |
| 6-11 years          | 8%                 | 8%                       |
| 12-19 years         | 10%                | 11%                      |
| 20-39 years         | 21%                | 23%                      |
| 40-59 years         | 31%                | 28%                      |
| 60 years and older  | 25%                | 22%                      |

Supplement Table 6. Second round serum PFAS concentrations for Hoosick Falls participants (with repeat PFOA tests) (N=316), and, for comparison, the general U.S. population age 12 and up (NHANES)<sup>56</sup>

| PFAS  | Participants served by<br>Hoosick Falls public water |             |              | U.S. population<br>2015-2016 |              |
|-------|------------------------------------------------------|-------------|--------------|------------------------------|--------------|
|       | % of samples with<br>PFAS detected                   | GM<br>(ppb) | P95<br>(ppb) | GM<br>(ppb)                  | P95<br>(ppb) |
| PFBuS | 0%                                                   | NA          | NA           | NA                           | NA           |
| PFHpA | 0.3%                                                 | NA          | NA           | NA                           | 0.20         |
| PFHxS | 88%                                                  | 1.1         | 3.01         | 1.18                         | 4.90         |
| PFNA  | 60%                                                  | 0.6         | 1.4          | 0.577                        | 1.90         |
| PFOS  | 98%                                                  | 4.7         | 15.2         | 4.72                         | 18.3         |
| PFOA  | 99%                                                  | 35.0        | 159.0        | 1.56                         | 4.17         |

Abbreviation: NA= Not applicable; GM=Geometric mean; P95=95<sup>th</sup> percentile

Source: NYSDOH Biomonitoring program.

**Supplement Figure 1. Serum PFOA concentration distributions at 2016 baseline for participants served by the Hoosick Falls public water, Petersburg public water, or by private wells and/or previously by public water**

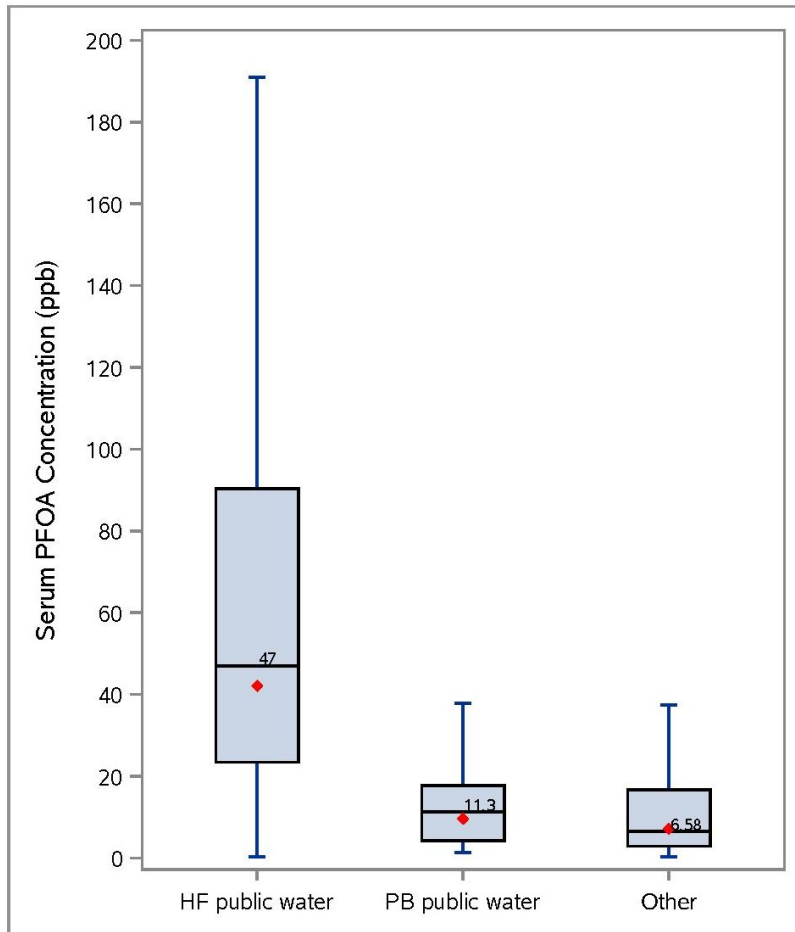

Hoosick Falls (HF) public water: n=1,573;

Petersburgh (PB) public water: n=51;

Private well/other: n=1,618.

Box plots indicate the geometric means (red diamond), medians (value provided) and interquartile ranges.

Source: NYSDOH biomonitoring program.

**Supplement Figure 2. Serum PFOA concentrations (geometric means) in ppb for selected U.S. communities with contaminated drinking water, and the U.S. general population**

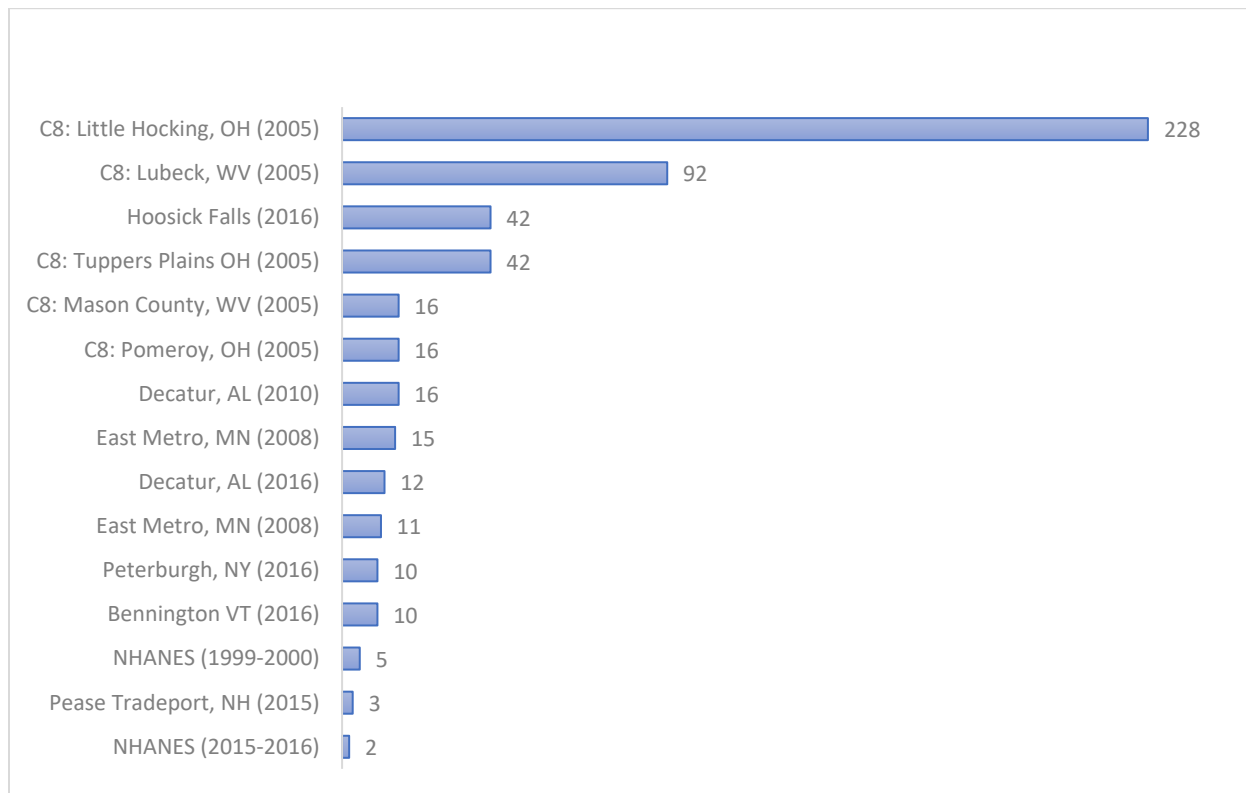

**Sources:**

OH and WV<sup>33</sup>; NH<sup>42</sup>; AL<sup>45</sup>; MN<sup>34</sup>; VT<sup>38</sup>; NHANES<sup>56</sup>.  
 NYS Biomonitoring program.



**Supplement Figure 3. Distribution of 2016 baseline serum PFOA concentrations among Hoosick Falls participants**

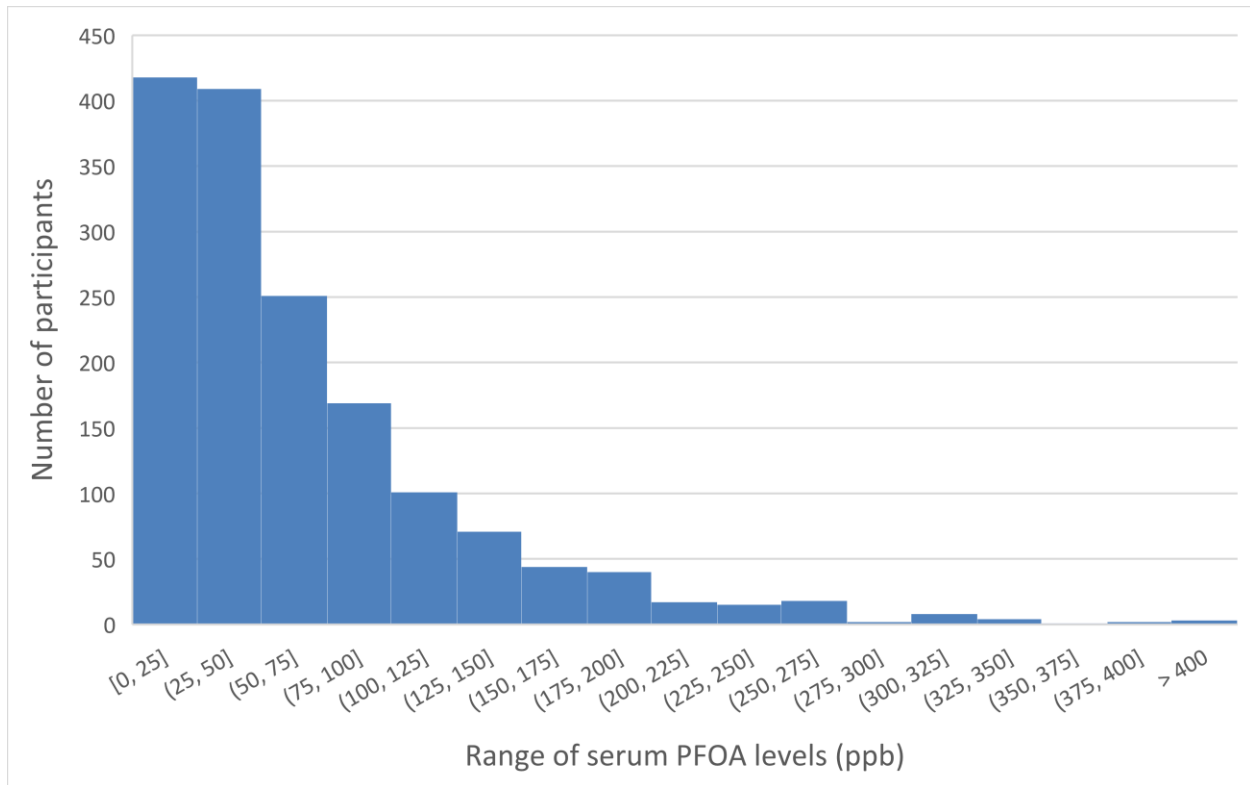

N = 1,573

Source: NYSDOH Biomonitoring program.

**Supplement Figure 4: Serum PFOA half-life estimates for Hoosick Falls participants**

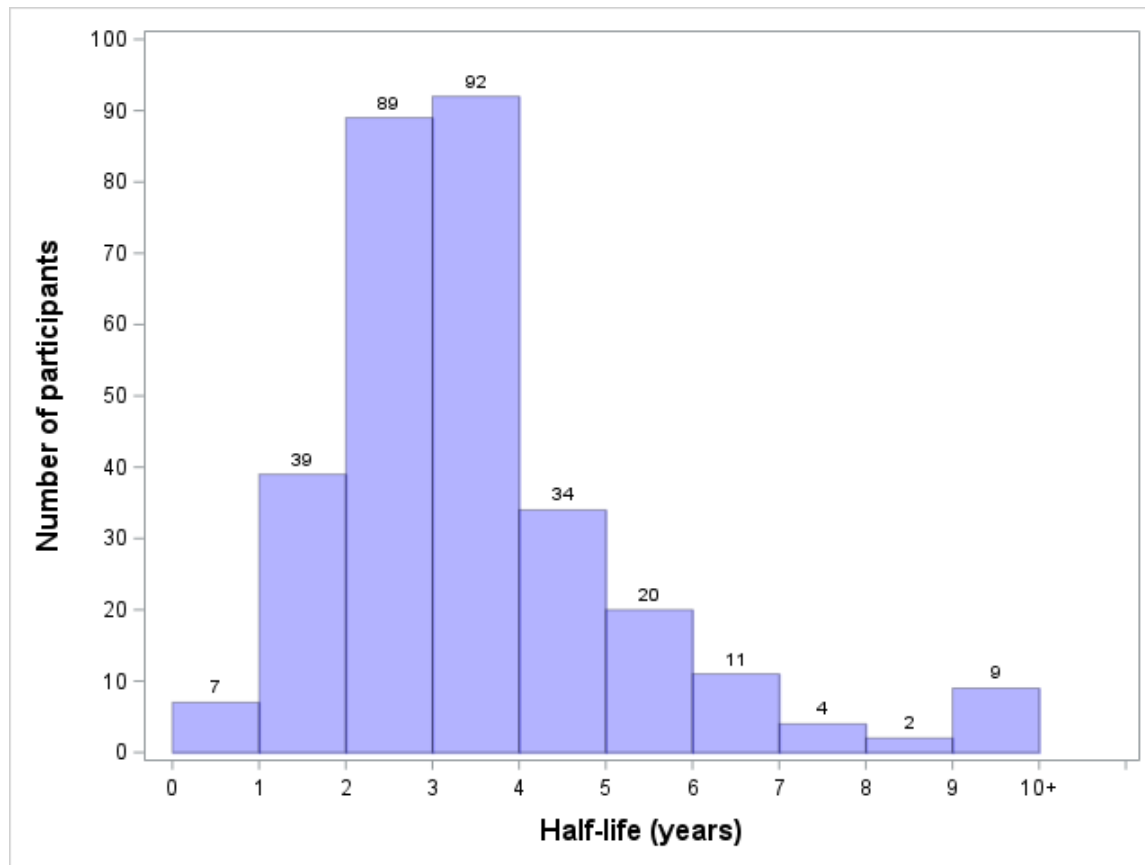

N=307

Source: NYSDOH Biomonitoring program.
